# Supplementary material for: Effects of Regulatory T Cell Depletion in BALB/c Mice Infected with Low Doses of Borrelia burgdorferi
Source: MDPI journal article supplement (doi:10.3390/pathogens12020189), 2023-01-25
Supplement: s1 [file s1]

**Supplementary Data, Santiago and Kozlik, *et al.***

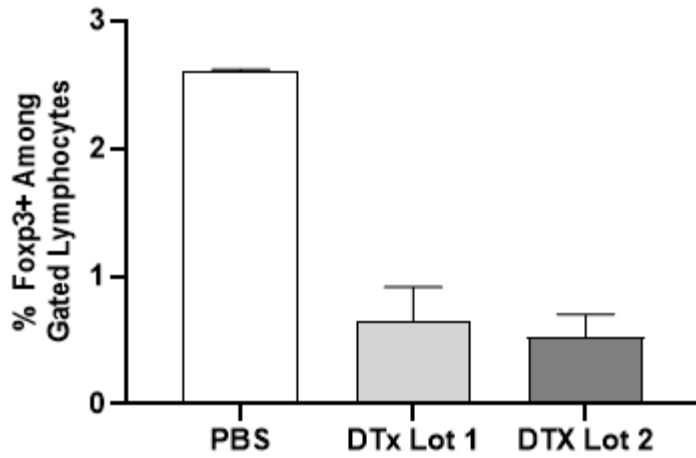

**Figure S1. Depletion of Foxp3<sup>+</sup> cells using DTx.** Two lots of DTx were used in this study.

Proportions of Foxp3<sup>+</sup> cells among splenic lymphocytes obtained from BALB/c DEREg mice administered 1 $\mu$ g DTx in PBS for two consecutive days or administered PBS alone are shown.

After injection of mice with PBS alone, 2.61%  $\pm$  0.01% of cells were Foxp3<sup>+</sup> one day later (n = 2). By contrast, one day after administration of DTx in PBS to BALB/c DEREg mice, the proportion of Foxp3<sup>+</sup> cells was reduced by approximately 75% (0.66%  $\pm$  0.26%; n = 3) and 80% (0.53%  $\pm$  0.18%; n = 3) with each respective lot of DTx.

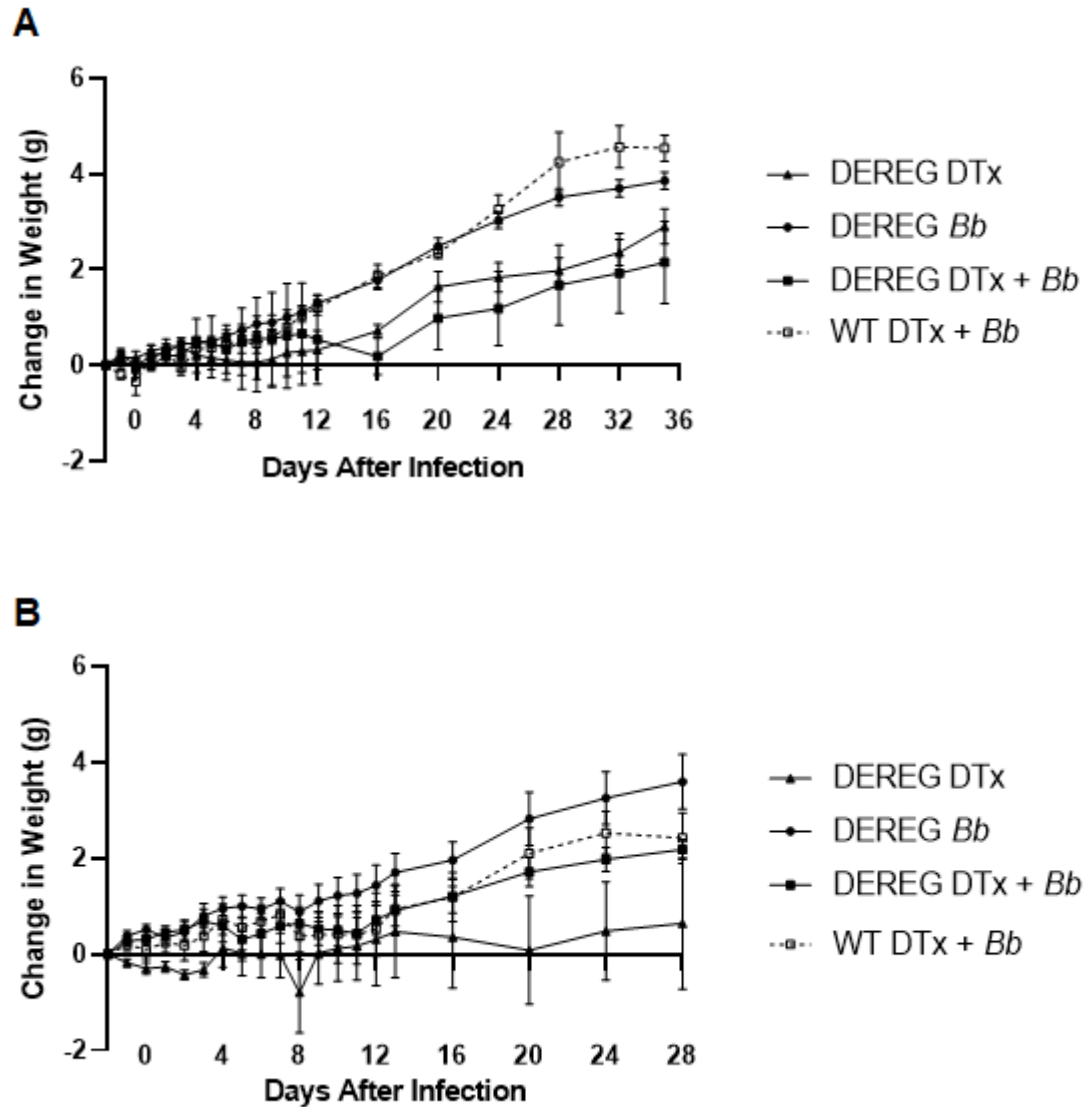

**Figure S2. Effects of DTx on weights of mice.** DTx in PBS, or PBS alone, were administered to wild-type and DEREg BALB/c mice for two consecutive days prior to infection with  $1 \times 10^3$  (A) or  $5 \times 10^3$  (B) *B. burgdorferi* organisms. Weights of these mice were measured as an indication of overall health upon injection with the toxin. Closed squares, BALBc DEREg mice treated with DTx prior to infection (A,  $n = 7$ ; B,  $n = 8$ ); open squares, wild-type BALB/c mice treated with DTx prior to infection (A,  $n = 4$ ; B,  $n = 8$ ); circles, BALB/c DEREg mice administered PBS prior to infection (A,  $n = 8$ ; B,  $n = 8$ ); triangles, BALB/c DEREg mice administered DTx

without subsequent infection (A,  $n = 7$ ; B,  $n = 3$ ). Data are the means of values within each group  $\pm$ SEM.
